# Supplementary material for: Mechanistic or mammalian target of rapamycin (mTOR) may determine robustness in young male mice at the cost of accelerated aging
Source: publisher site journal article supplement (doi:10.18632/aging.100528), 2012-12-21
Supplement: Supplementary file [file aging-v4i12-100528-supplementary-material-SD1.pdf]

## SUPPLEMENTAL FIGURE

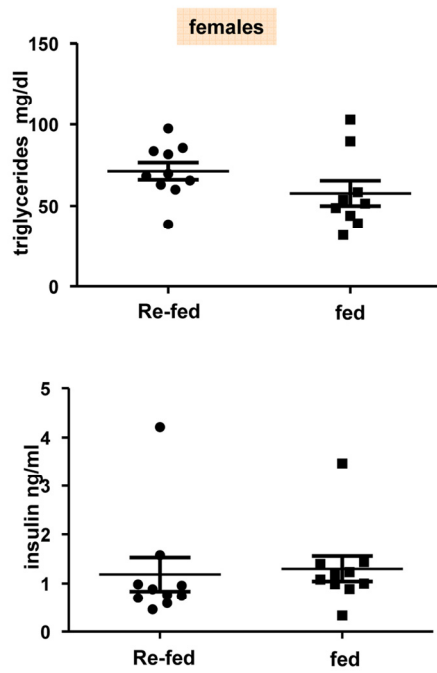

**Figure S1.** Levels of insulin and triglycerides in two sub-groups of females: individual mice 1-10 versus individual mice 21-30.
